# Supplementary material for: Identification of downstream signaling cascades of ACK1 and prognostic classifiers in non-small cell lung cancer
Source: publisher site journal article supplement (doi:10.18632/aging.202408), 2021-01-20
Supplement: Supplementary file [file aging-v13i3-202408-supplementary-material-SD1.pdf]

SUPPLEMENTARY FIGURES

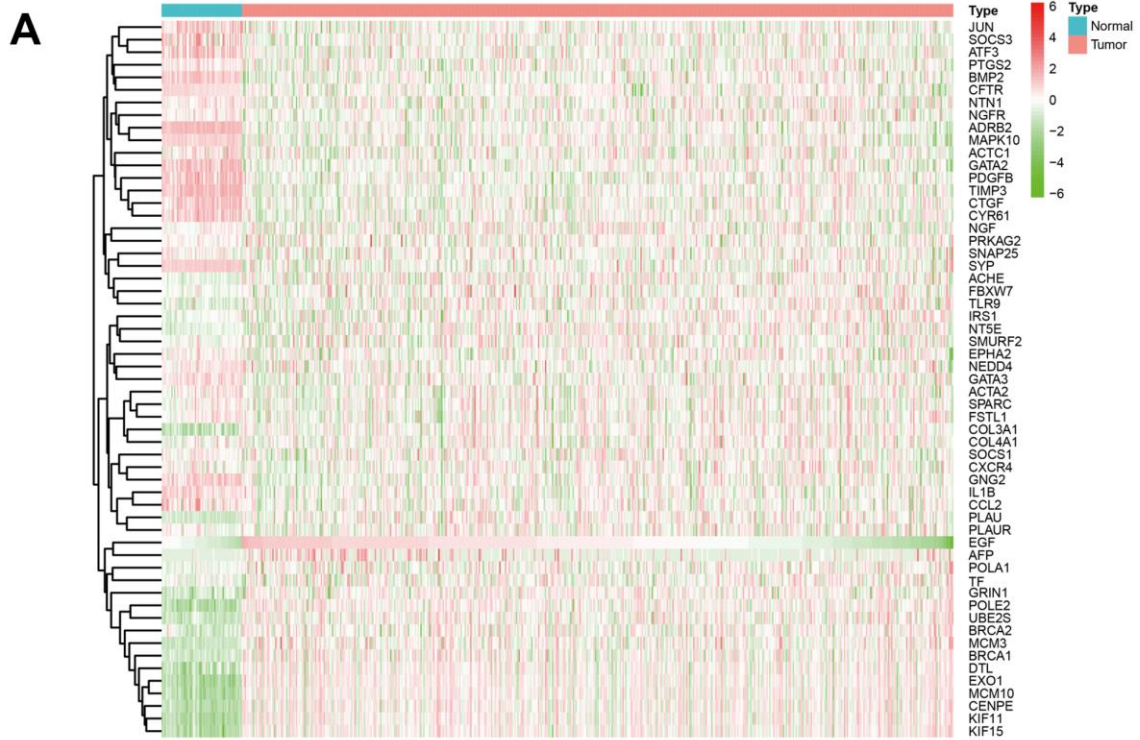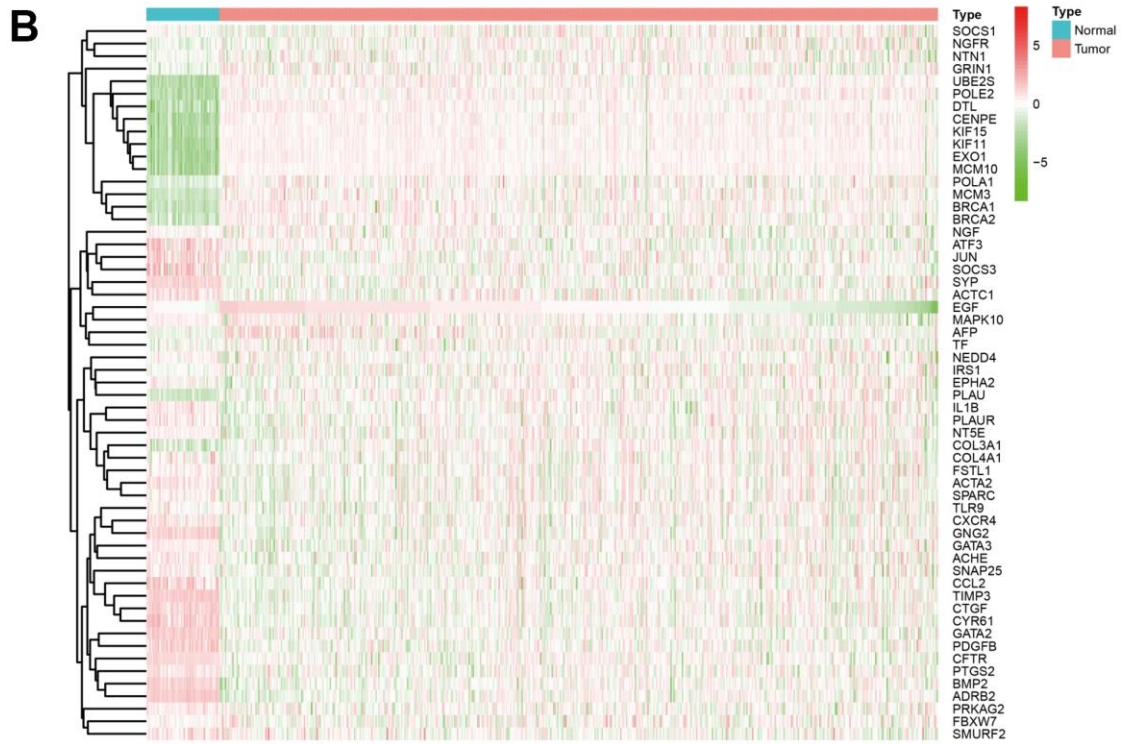

Supplementary Figure 1. Expression profiles of 57 hub genes with degree  $\geq 20$  in LUAD (A) and LUSC (B).

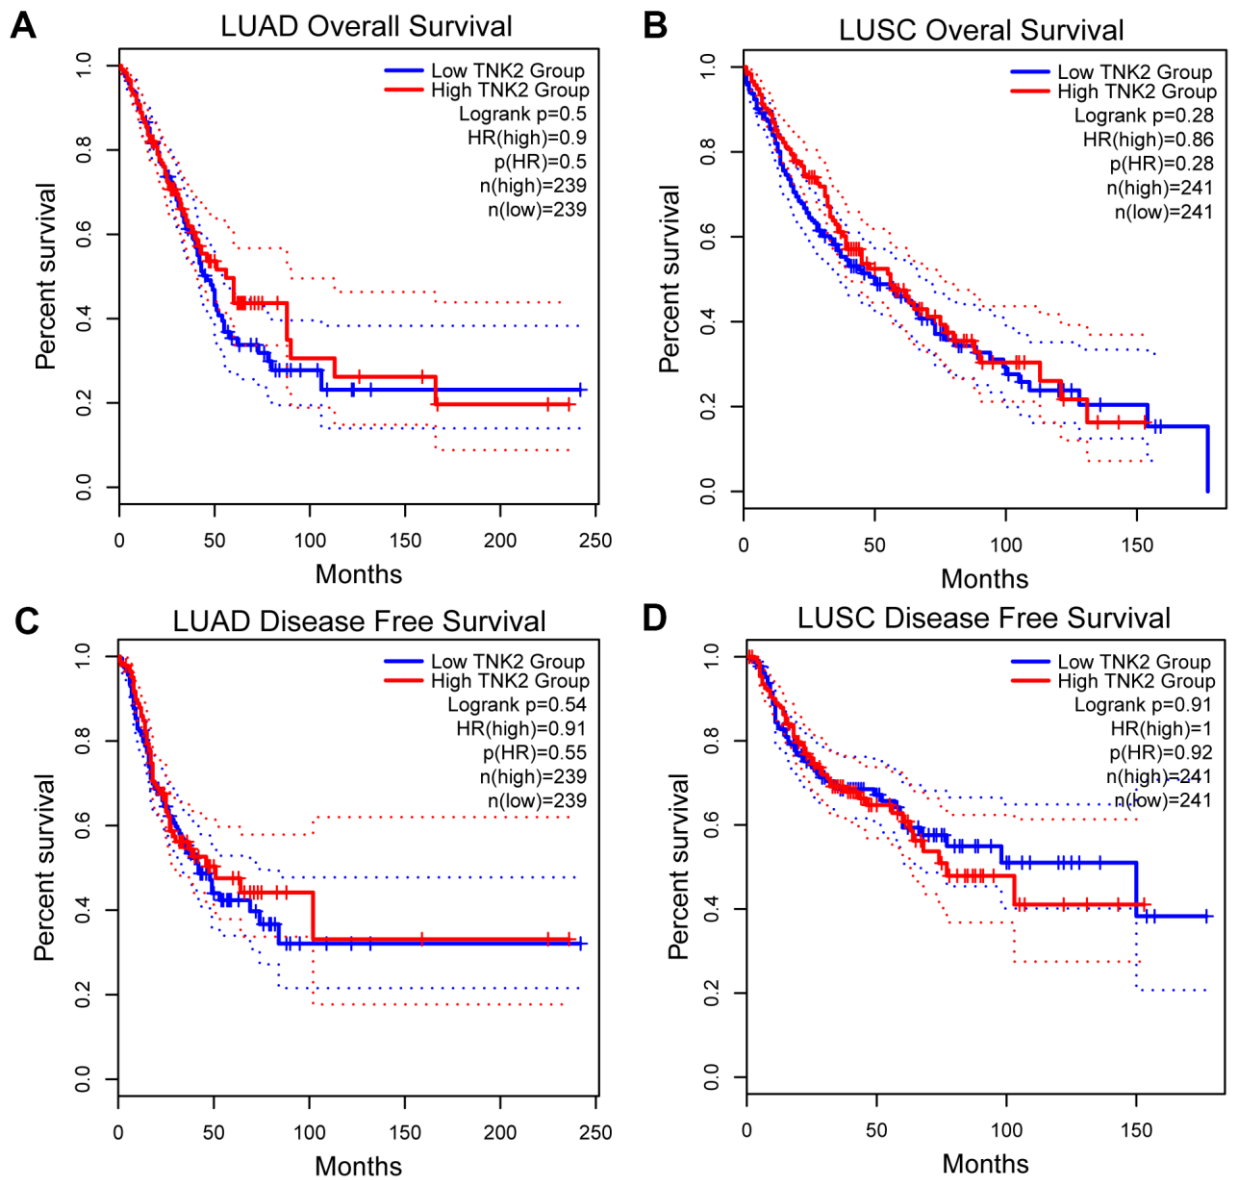

**Supplementary Figure 2. Kaplan-Meier survival analysis for estimating the prognostic capacity of the *ACK1* in TCGA lung cohorts.** Risk group stratification by the *ACK1* expression levels with respect to the overall survival of LUAD (A) and LUSC (B). Risk group stratification by the *ACK1* expression levels with respect to disease-free survival of LUAD (C) and LUSC (D).
